# Supplementary material for: A proteolytic AAA+ machine poised to unfold protein substrates
Source: PubMed Central journal article supplement — Nat Commun. 2024 Nov 8;15:9681. doi: 10.1038/s41467-024-53681-9 (PMC11549327; doi:10.1038/s41467-024-53681-9), 2024-11-08
Supplement: 41467_2024_53681_MOESM1_ESM.pdf [file 41467_2024_53681_MOESM1_ESM.pdf]

## SUPPLEMENTARY INFORMATION

# A proteolytic AAA+ machine poised to unfold protein substrates

Alireza Ghanbarpour<sup>1,2</sup>, Robert T. Sauer<sup>2,\*</sup>, and Joseph H. Davis<sup>2,\*</sup>

<sup>1</sup>Department of Biochemistry and Molecular Biophysics  
Washington University in St. Louis  
St Louis, USA 63130

<sup>2</sup>Department of Biology  
Massachusetts Institute of Technology  
Cambridge, USA 02139

\*Equal contributions

✉ Correspondence: bobsauer@mit.edu, jhdavis@mit.edu

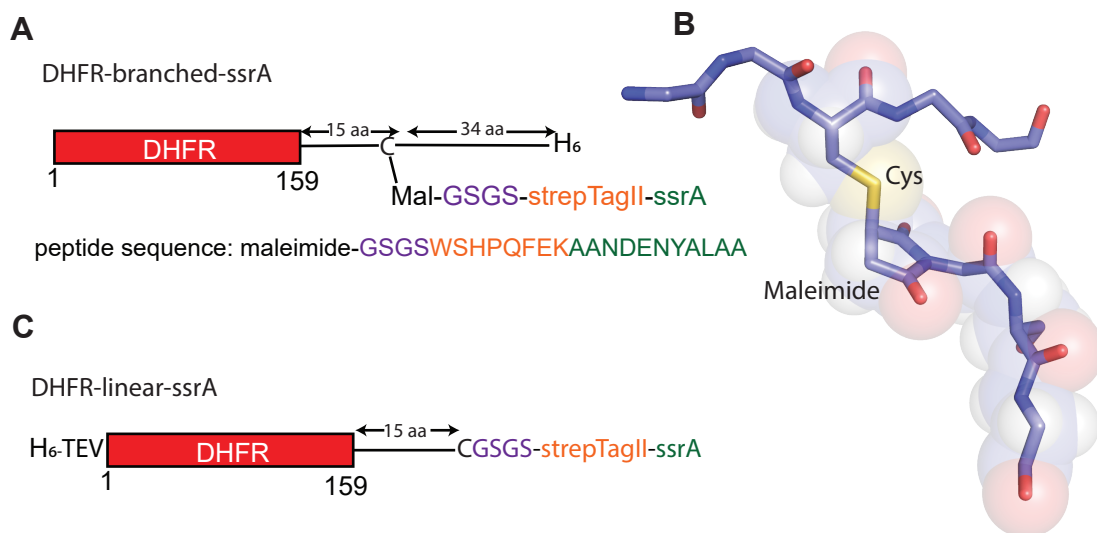

**Supplemental Figure 1.** Schematic and 3D representations of branched-degron (A, B) and linear-degron DHFR substrates (C).

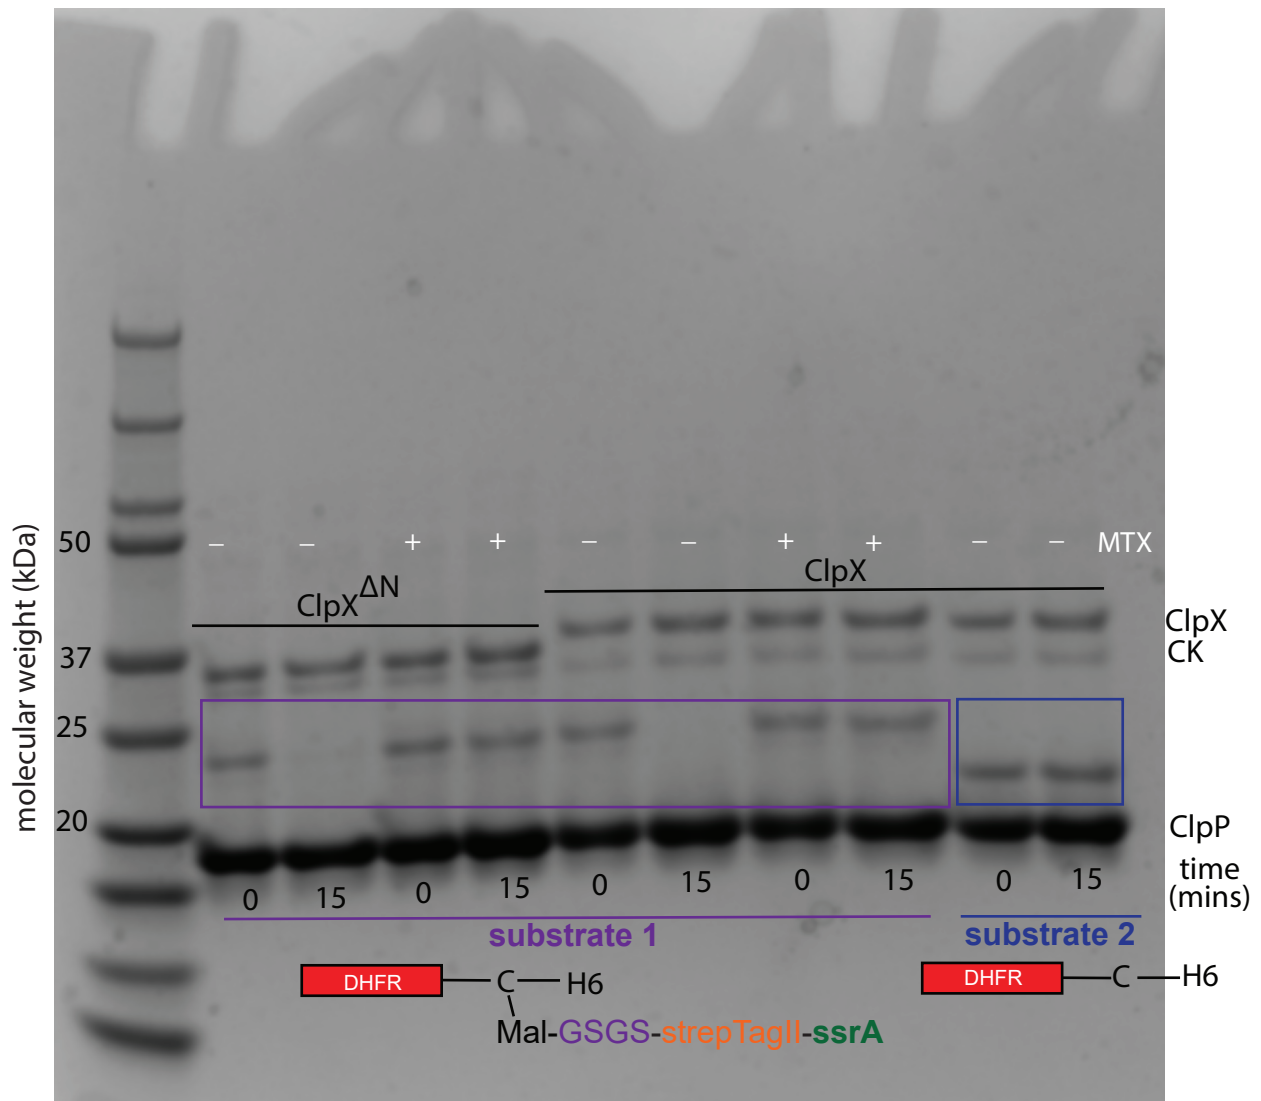

**Supplemental Figure 2.** Degradation of branched-degron DHFR (substrate 1, 5 μM) by ClpX<sup>ΔN</sup> or full-length ClpX<sub>6</sub> (0.5 μM) and ClpP<sub>14</sub> (1.5 μM) was assayed by SDS-PAGE gel in the presence or absence of MTX (20 μM). No degradation of a DHFR substrate without the ssrA tag (substrate 2) was observed in the absence of MTX.

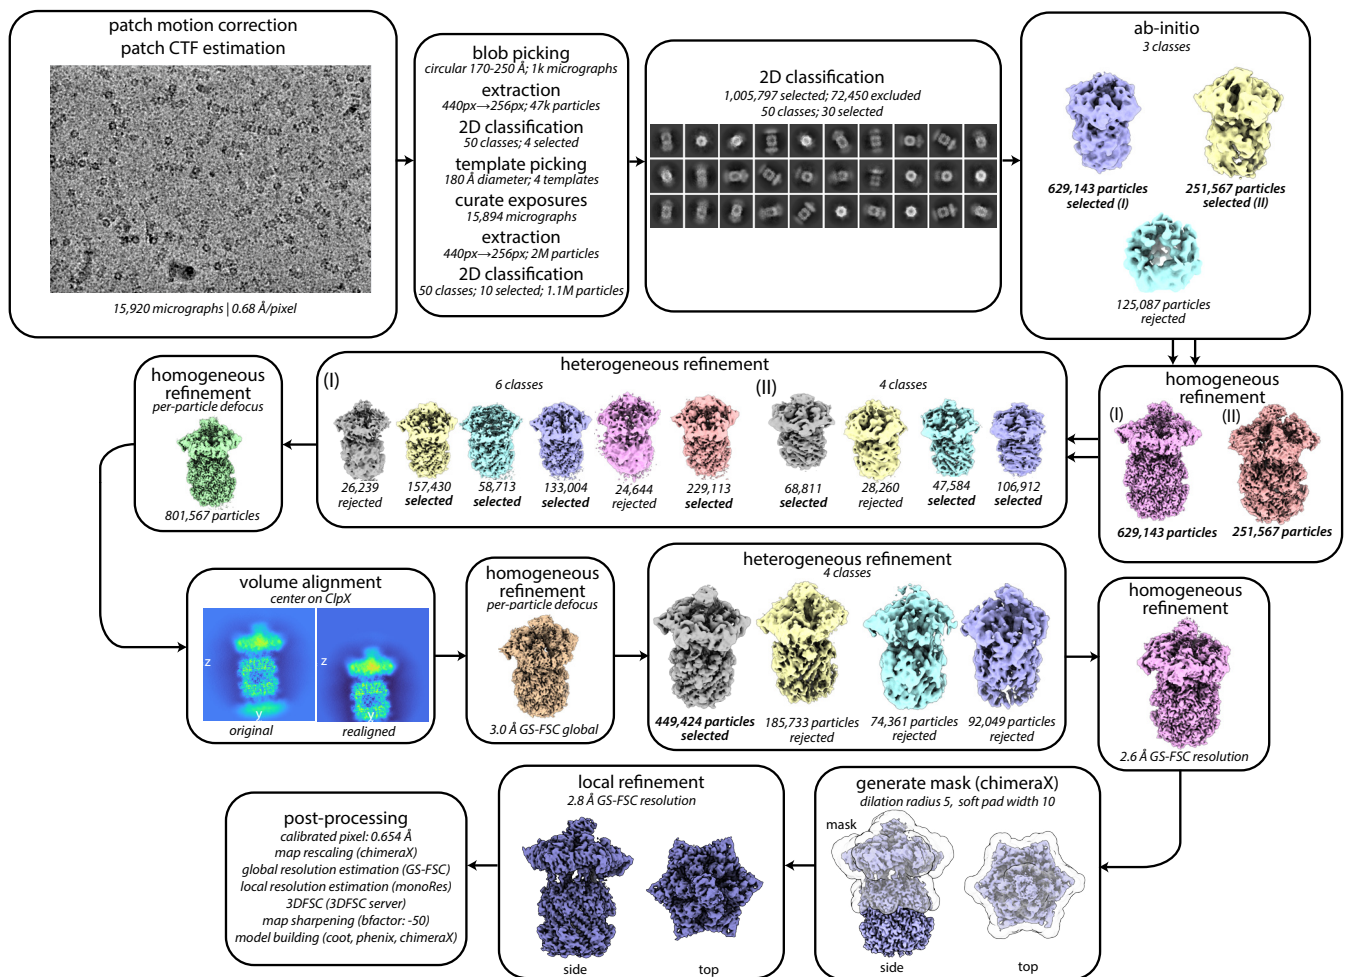

**Supplementary Figure 3. Image processing workflow: branched-degron DHFR•MTX.**

CryoSPARC processing workflow for single-chain ClpX<sup>ΔN</sup>/ClpP/branched-degron DHFR•MTX particles. Job names, job details, and non-default parameters (italicized) are noted in each box.

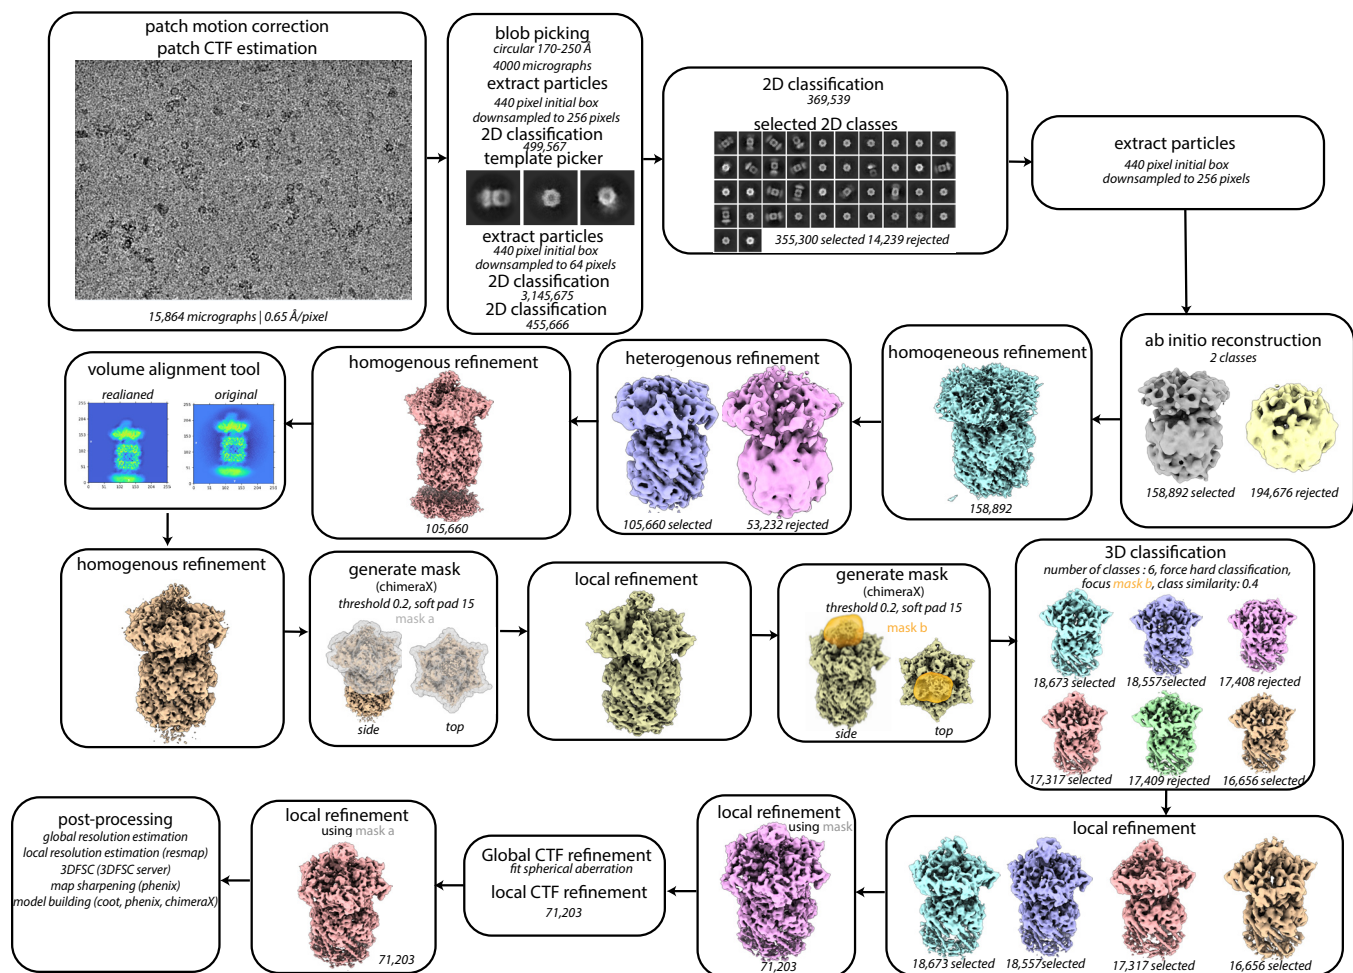

**Supplementary Figure 4. Image processing workflow: linear-degion DHFR-MTX.**

CryoSPARC processing workflow for single-chain ClpX<sup>ΔN</sup>/ClpP/linear-degion DHFR-MTX particles. Job names, job details, and non-default parameters (italicized) are noted in each box.

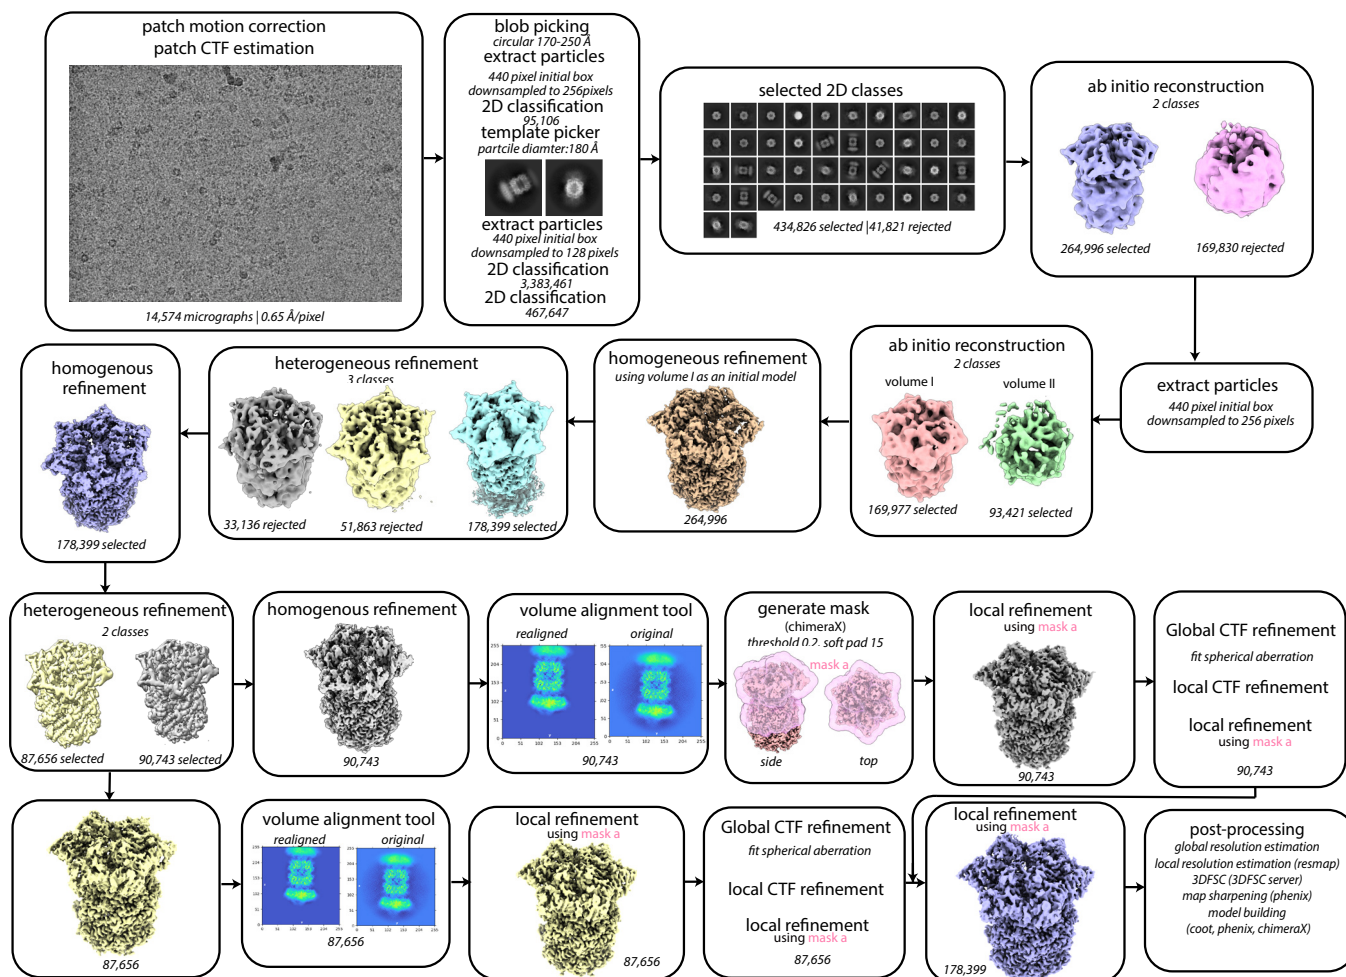

**Supplementary Figure 5. Image processing workflow: branched-degron DHFR (no MTX).**

CryoSPARC processing workflow for single-chain ClpX<sup>ΔN</sup>/ClpP/branched-degron DHFR (no MTX) particles. Job names, job details, and non-default parameters (italicized) are noted in each box.

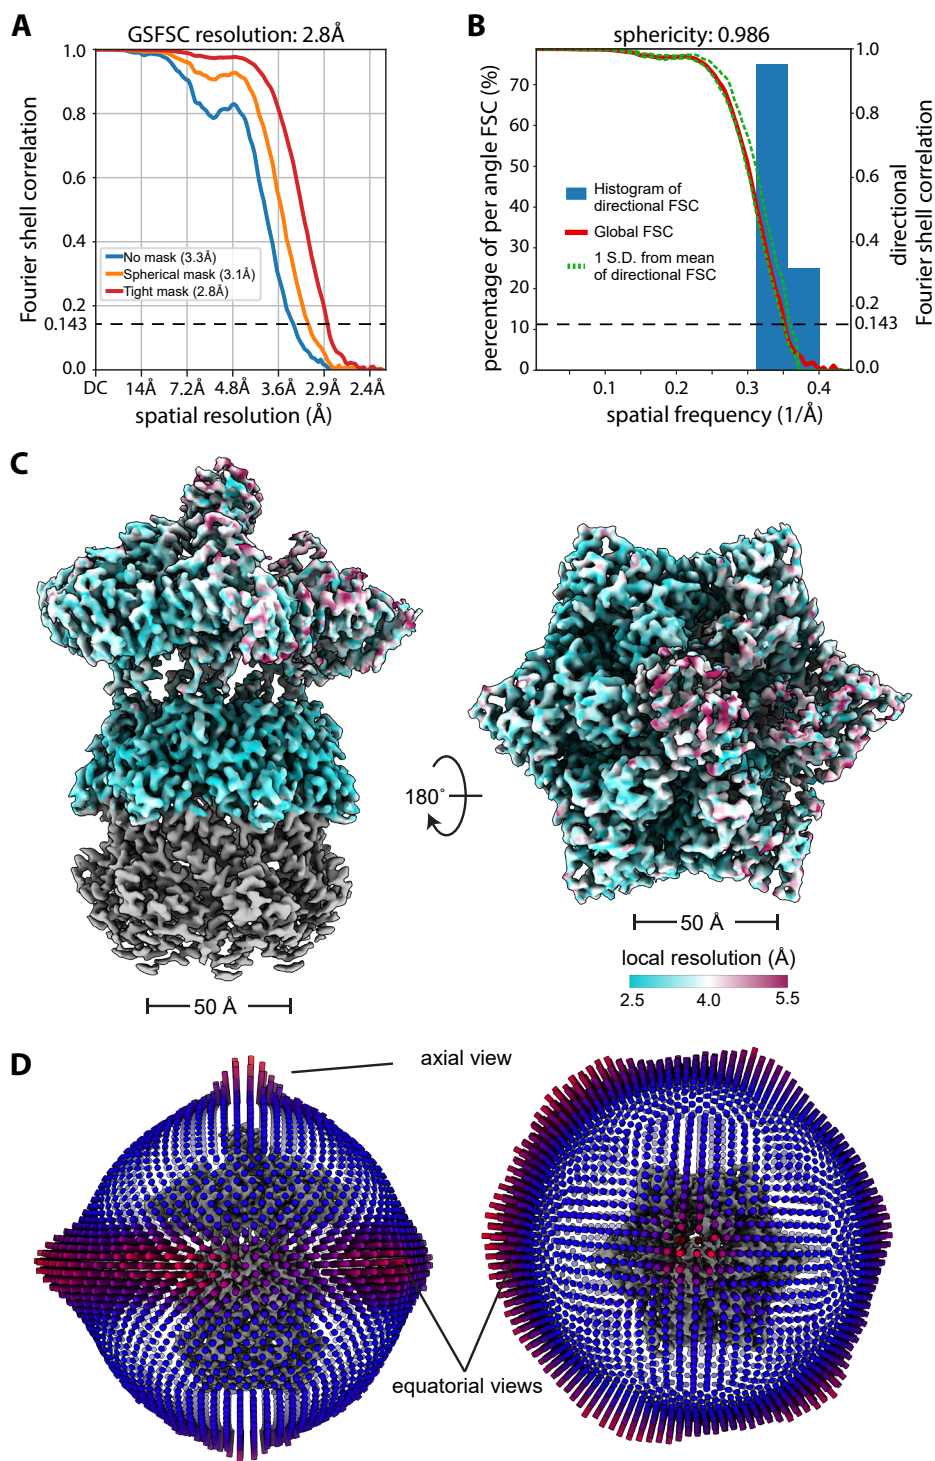

**Supplementary Figure 6. Estimates of resolution and angular sampling: branched-degron DHFR•MTX.**

(A) Global resolution estimated by the gold-standard Fourier Shell Correlation method as implemented in CryoSPARC (Punjani *et al.* 2017). (B) Directional FSC as estimated by the 3DFSC server (Tan *et al.* 2017). (C) Density map colored by local resolution as estimated by cryoSPARC's implementation of monoRes (Vilas *et al.* 2018). (D) Projection-angle distribution.

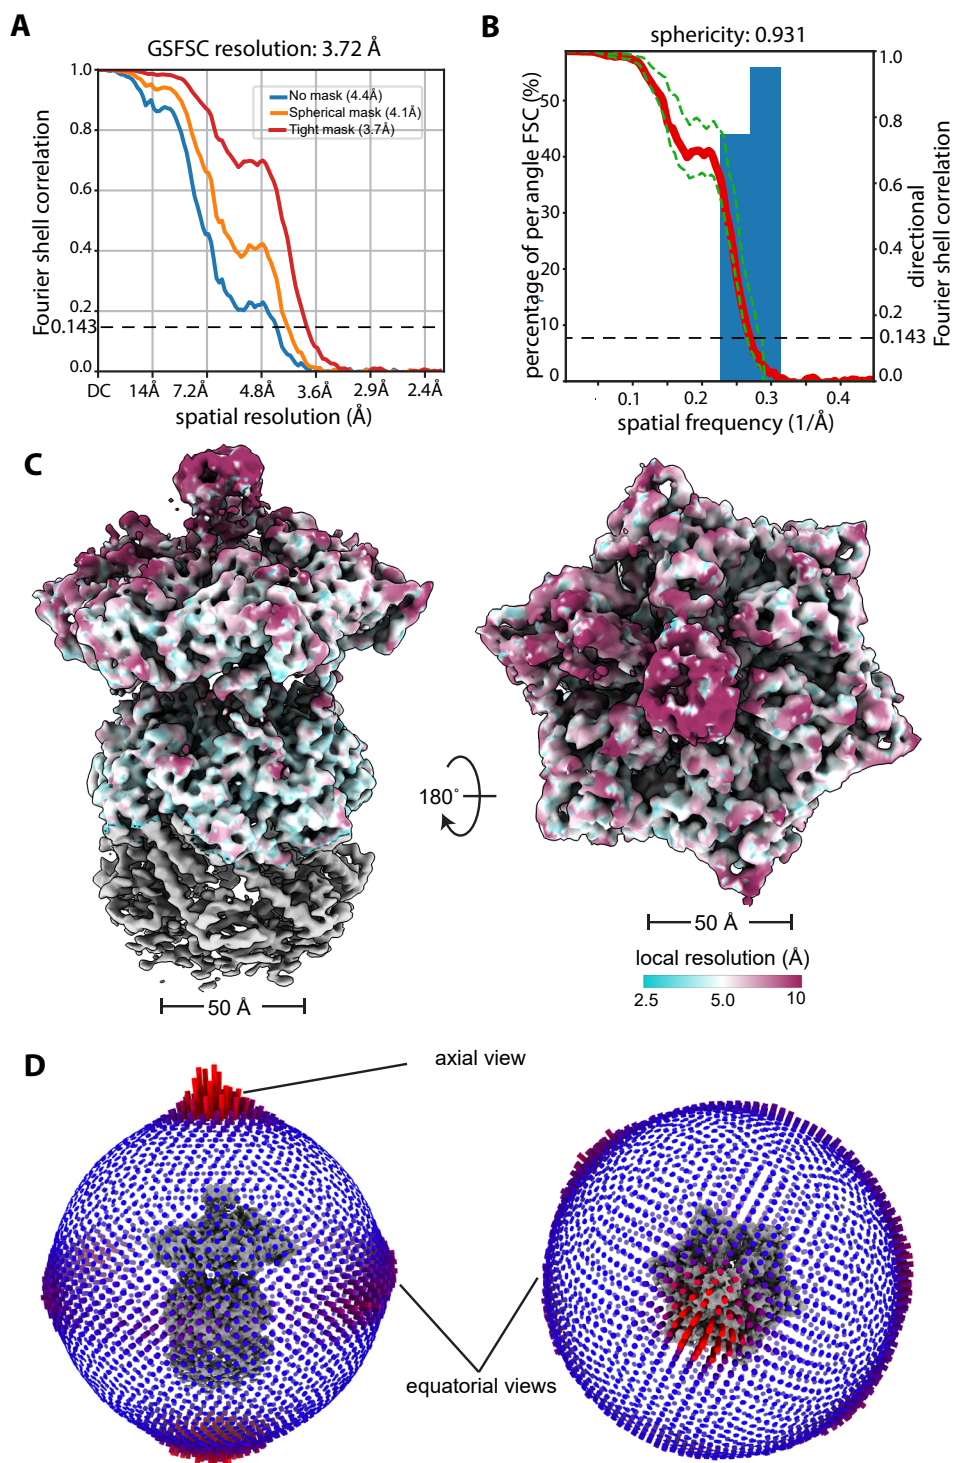

**Supplementary Figure 7. Estimates of resolution and angular sampling: linear-degron DHFR-MTX.**

(A) Global resolution estimated by the gold-standard Fourier Shell Correlation method as implemented in CryoSPARC (Punjani *et al.* 2017). (B) Directional FSC as estimated by the 3DFSC server (Tan *et al.* 2017). (C) Density map colored by local resolution as estimated by cryoSPARC's implementation of monoRes (Vilas *et al.* 2018). (D) Projection-angle distribution.



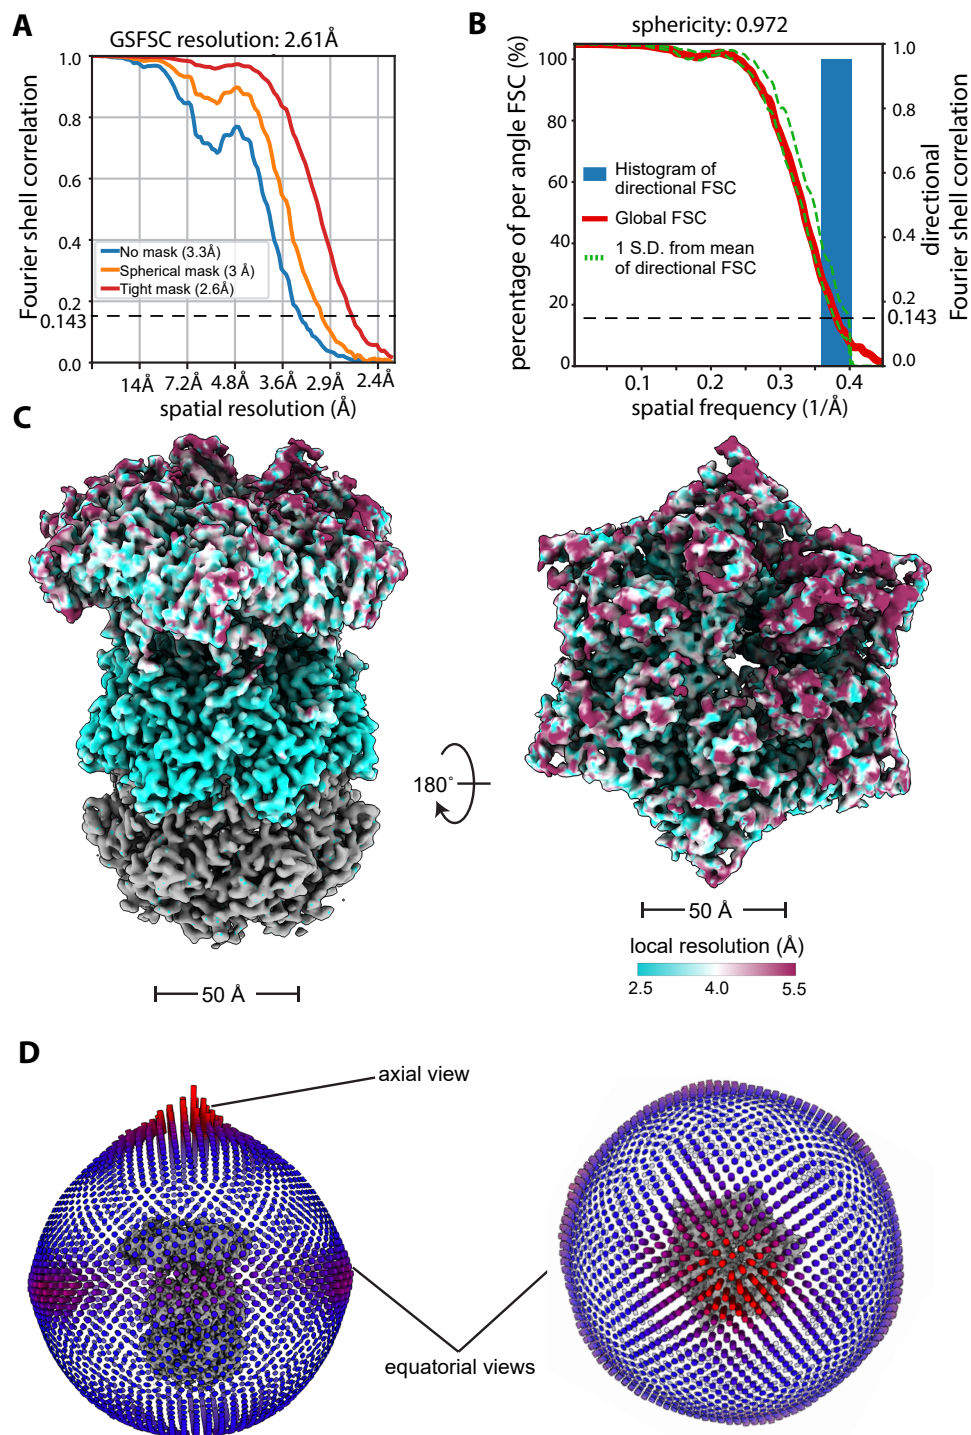

**Supplementary Figure 8. Estimates of resolution and angular sampling: branched-degron DHFR (no MTX).**

(A) Global resolution estimated by the gold-standard Fourier Shell Correlation method as implemented in CryoSPARC (Punjani *et al.* 2017). (B) Directional FSC as estimated by the 3DFSC server (Tan *et al.* 2017). (C) Density map colored by local resolution as estimated by cryoSPARC's implementation of monoRes (Vilas *et al.* 2018). (D) Projection-angle distribution.

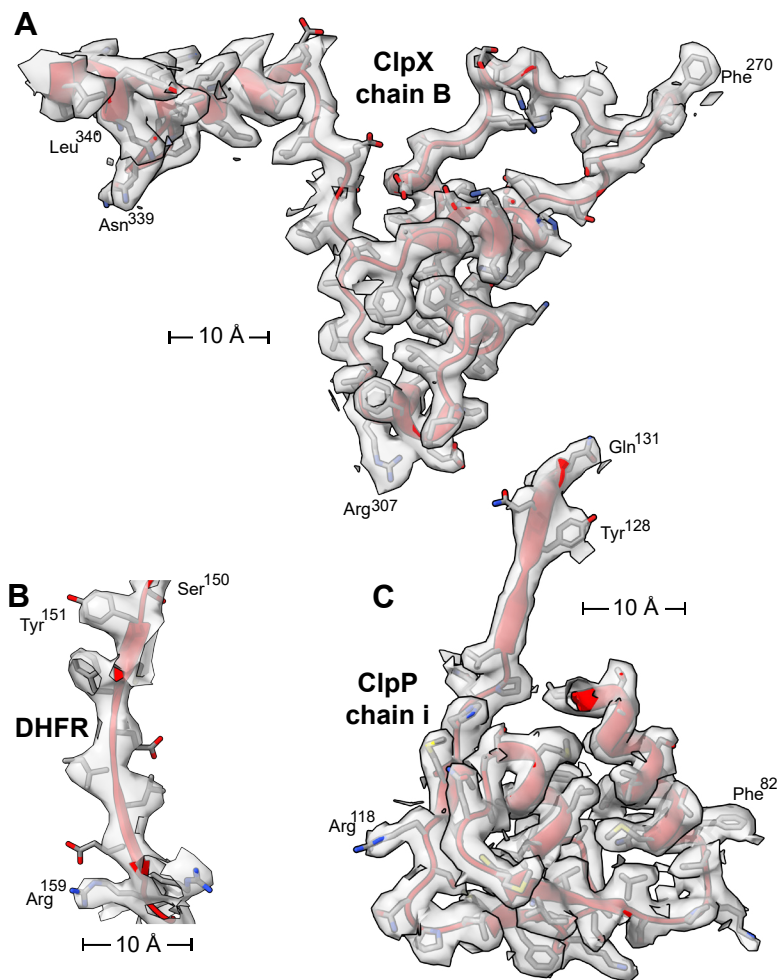

**Supplementary Figure 9. Cryo-EM density map and atomic model: branched-degron DHFR-MTX.**

Cryo-EM density map (grey semi-transparent surface) overlaid on the fitted atomic models, with secondary structure elements colored red, and side chains colored by atom type. (A) ClpX residues 270-340 of chain B<sup>2</sup>. (B) DHFR residues 150-160. (C) ClpP residues 82-131 of chain i.

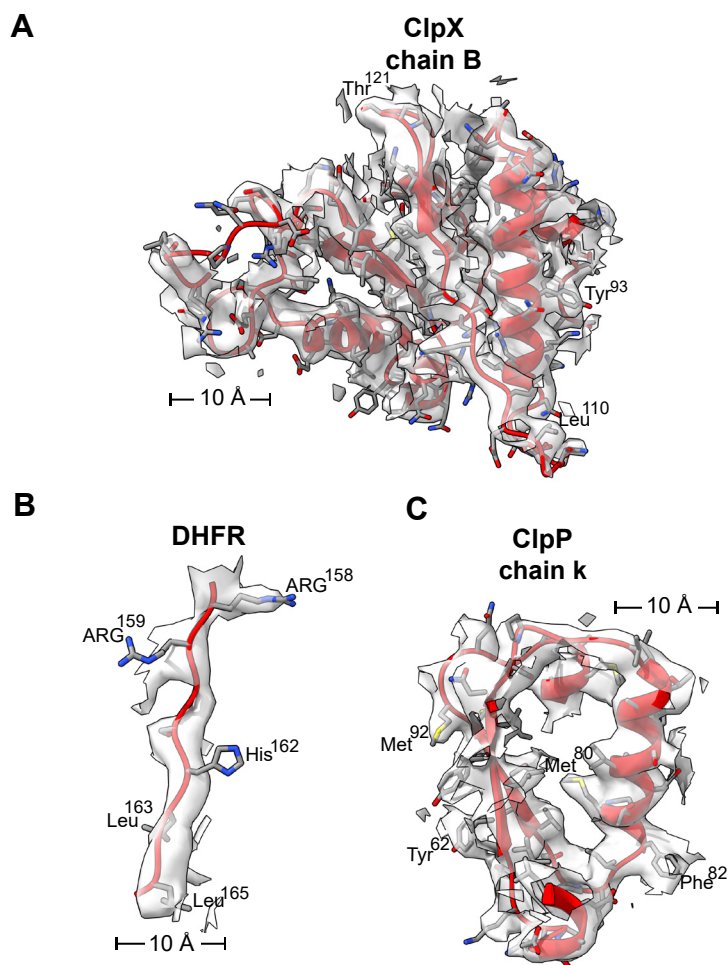

**Supplementary Figure 10. Cryo-EM density map and atomic model: linear-degron DHFR-MTX.**

Cryo-EM density map (grey semi-transparent surface) overlaid on the fitted atomic models, with secondary structure elements colored red, and side chains colored by atom type. (A) ClpX residues 50-200 of chain B<sup>2</sup>. (B) DHFR residues 158-165. (C) ClpP residues 50-100 of chain k.

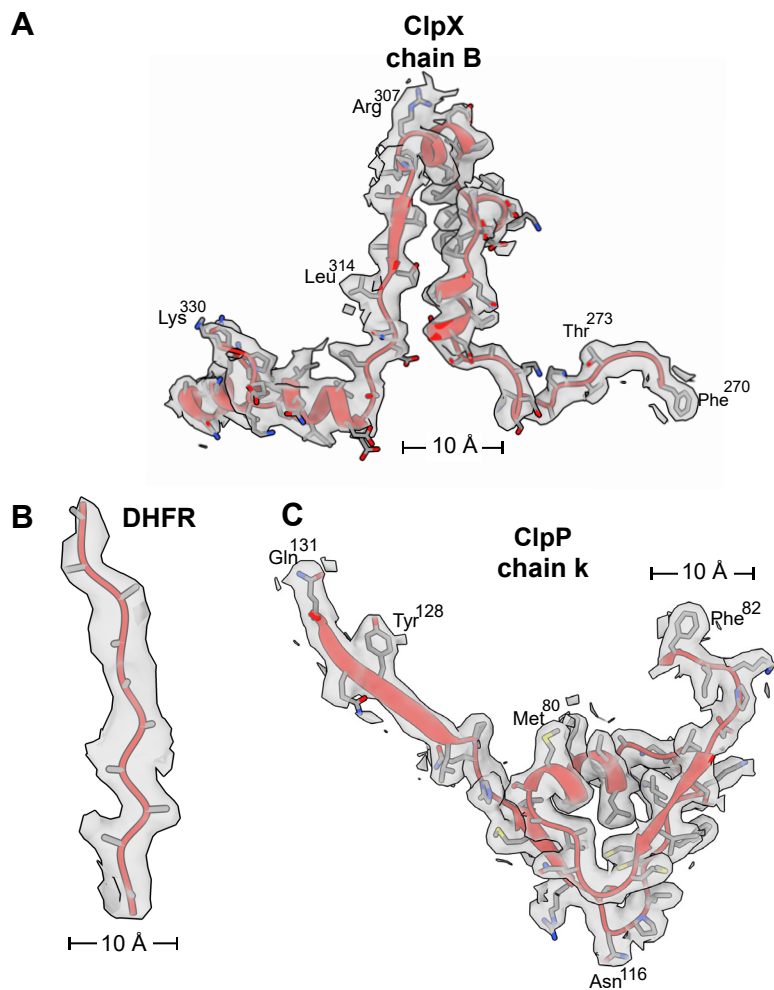

**Supplementary Figure 11. Cryo-EM density map and atomic model: branched-degron DHFR (no MTX).**

Cryo-EM density map (grey semi-transparent surface) overlaid on the fitted atomic models, with secondary structure elements colored red, and side chains colored by atom type. (A) ClpX residues 270-340 of chain B<sup>2</sup>. (B) DHFR residues 150-160. (C) ClpP residues 82-131 of chain i.

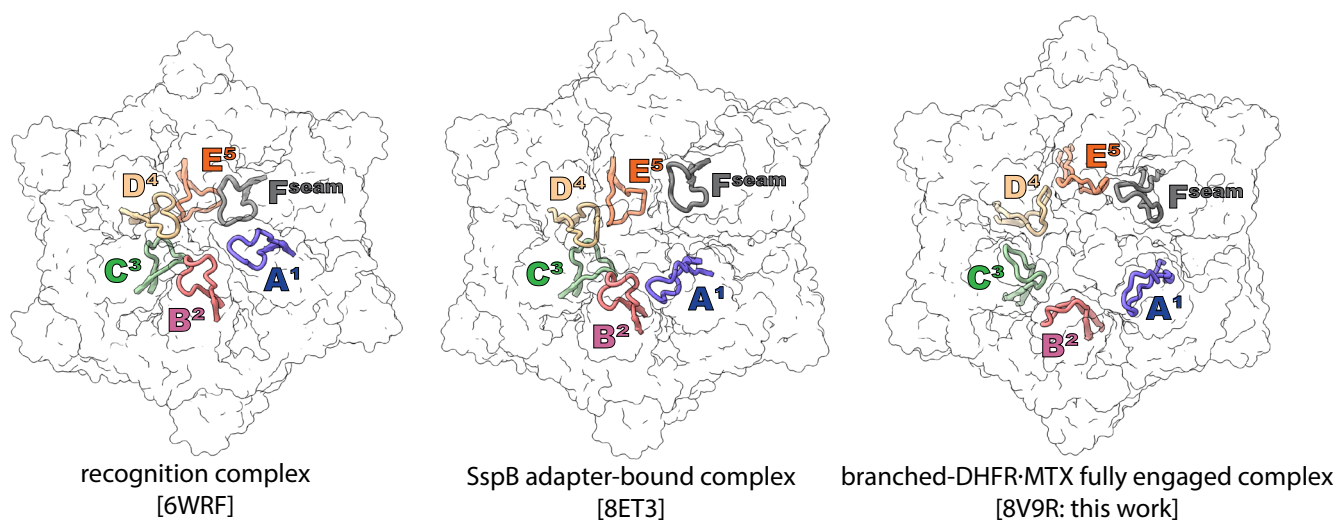

**Supplementary Figure 12. Conformational flexibility of ClpX RKH loops.**

Diverse conformations of RKH loops (residues 218-240 shown in cartoon representation) from ClpXP structure 6WRF (left) (Fei *et al.* 2020), 8ET3 (center) (Ghanbarpour *et al.* 2023), and ClpXP bound to branched-degron DHFR•MTX (PDB code 8V9R) from this study (right). Subunit colors: A<sup>1</sup> (purple), B<sup>2</sup> (salmon), C<sup>3</sup> (green); D<sup>4</sup> (wheat), E<sup>5</sup> (orange), and F<sup>seam</sup> (gray).

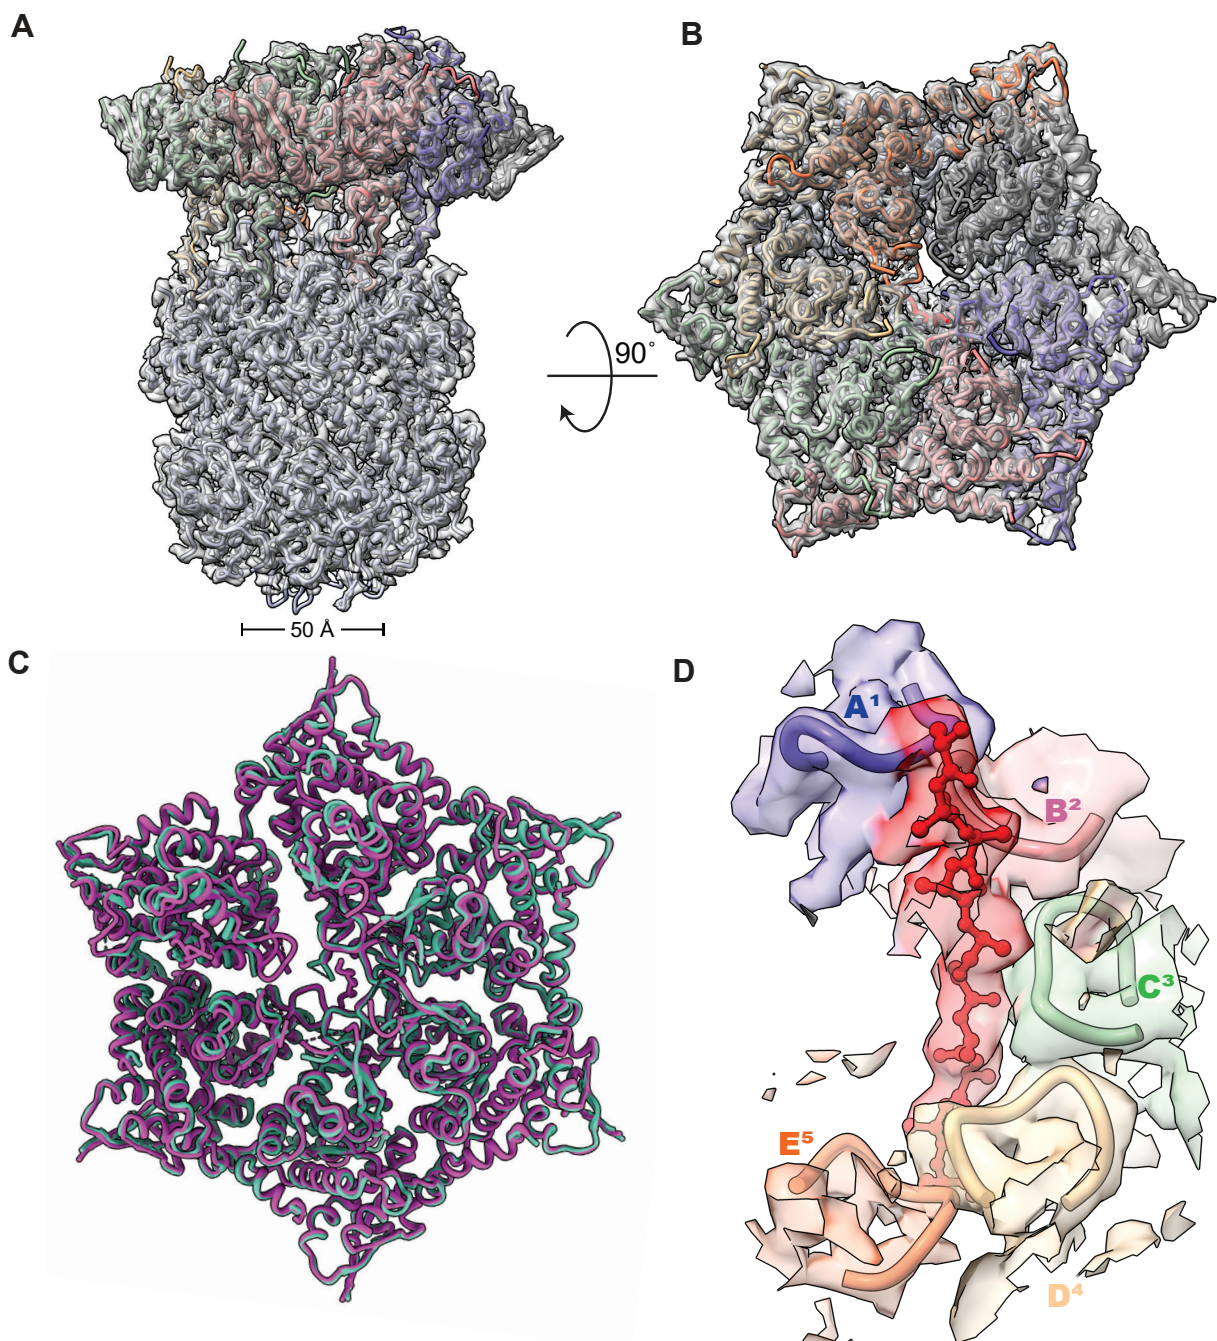

**Supplementary Figure 13. Structure of ClpXP determined with branched-degron DHFR in the absence of MTX closely resembles the previous 6WSG translocation complex.**

(A,B) Overlaid density maps and models for structure ClpX<sup>ΔN</sup>-ClpP-branched-DHFR (PDB ID: 9C88) are shown in side and top views, respectively. Note that substrate density above the axial channel is absent in panel A. (C) Cartoon overlay of ClpX structures from structure ClpX<sup>ΔN</sup>-ClpP-branched-DHFR (PDB code 9C88: purple) and the translocation complex (PDB code 6WSG: green). (D) Overlaid density map and atomic model for structure ClpX<sup>ΔN</sup>-ClpP-branched-DHFR shows that the pore-1 loops (residues 150-155) of ClpX chains A<sup>1</sup>, B<sup>2</sup>, C<sup>3</sup>, D<sup>4</sup> and E<sup>5</sup> assume a spiral conformation that interacts with two-residue segments of the substrate polypeptide in a β-strand conformation (red ball and stick representation).

**ClpXP/recognition**

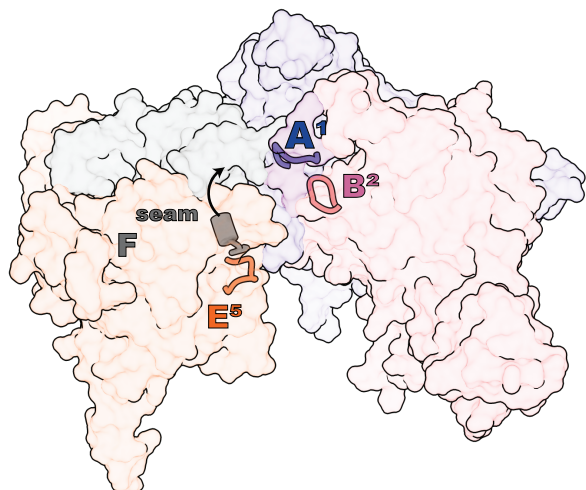

**ClpXP/fully engaged**

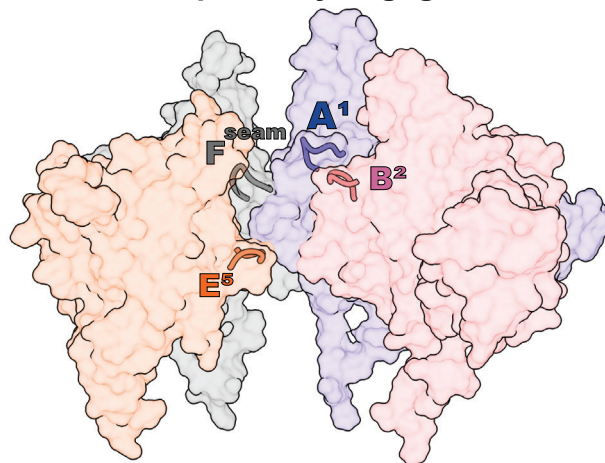

**Supplementary Figure 14. The upward movement of F<sup>seam</sup> pore-1 loop.**

Comparison of the F<sup>seam</sup> pore-1 loop location in the ClpXP recognition complex structure (PDB code 6WRF) at left, and ClpXP fully engaged complex at right (PDB code 8V9R: branched-degron-DHFR-MTX). The subunits C and D are hidden for clarity. The pore-1 loops (150-155) are shown in cartoon representation and are color-coded by subunits.

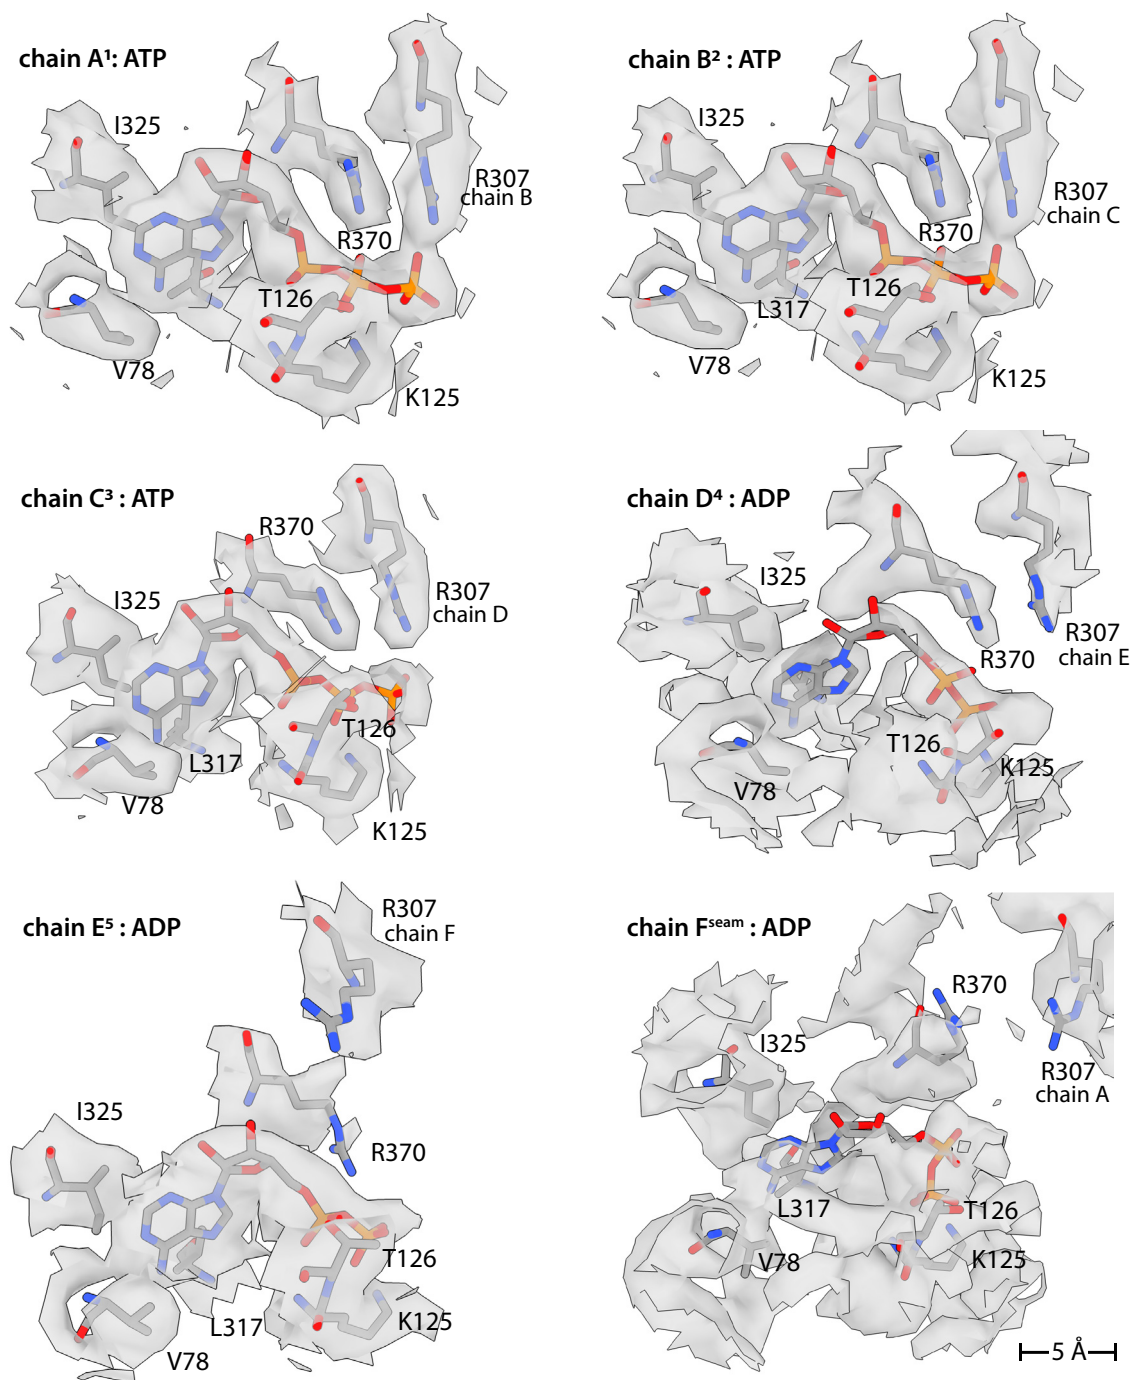

Supplementary Figure 15. Density for ATP or ADP bound to different ClpX subunits in the branched-DHFR-MTX fully engaged structure. Density map (grey semi-transparent surface) overlaid on atomic models colored by atom type.



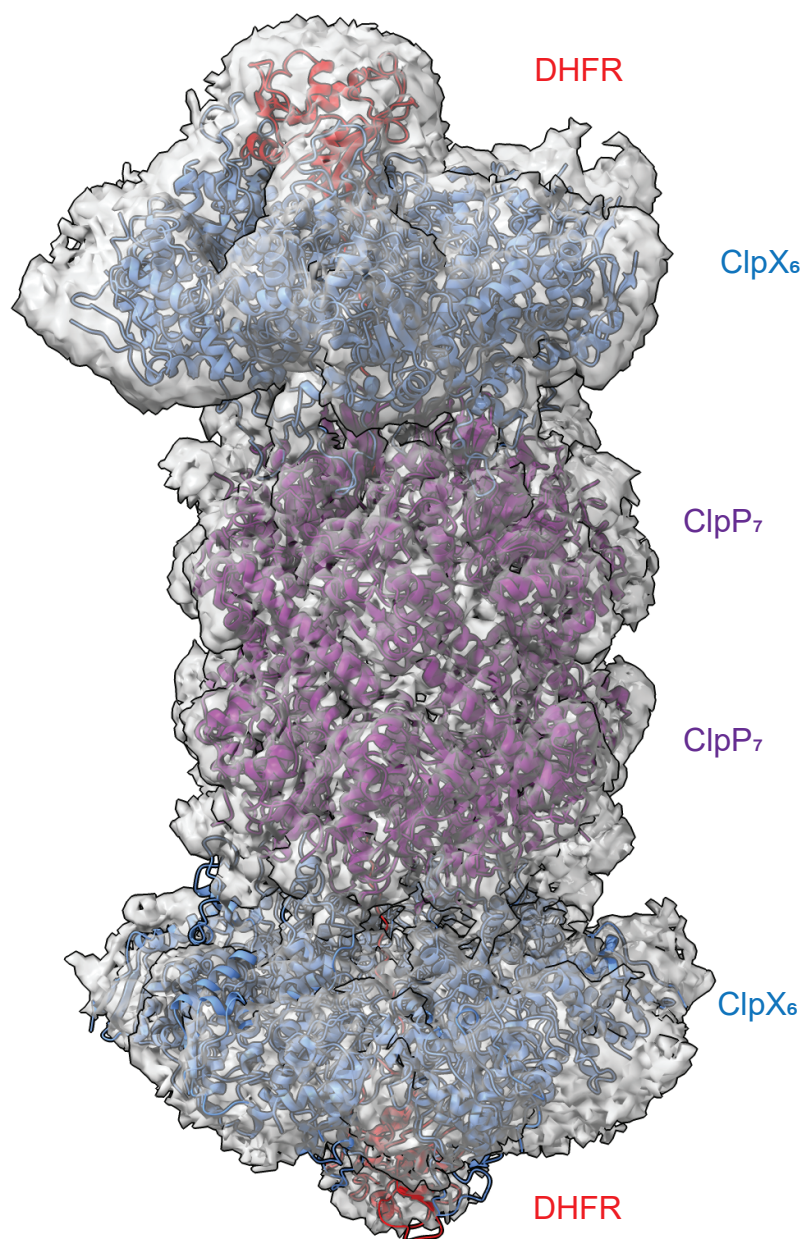

**Supplementary Figure 16. Low-resolution structure of ClpX engaged with branched-degron DHFR-MTX bound to both heptameric rings of ClpP<sub>14</sub>.** The ClpX-DHFR complex on the bottom adopts multiple registers relative to the top complex and has low resolution as a consequence of conformational averaging.

**Supplementary Movie 1. Movements of the F<sup>seam</sup> subunit pore-1 loop.** A morph between atomic models of the recognition complex (PDB code 6WRF) and the fully engaged branched-degron DHFR•MTX complex (PDB code 8V9R). In the morph, the pore-1 loop of the F<sup>seam</sup> subunit in the substrate engaged structure has moved higher, positioning it closest to the pore-1 loop of subunit A<sup>1</sup> compared to its position in the recognition complex, where it is closest to the pore-1 loop of subunit E<sup>5</sup>.

**Supplementary Movie 2. Analysis of structural heterogeneity in the branched-degron DHFR•MTX complex.** A sampling of 100 volumes sampled from the *k*-means cluster centroid locations of latent embeddings displayed over a fixed atomic model (PDB code 8V9R). Note that we did not observe structures with the F<sup>seam</sup> subunit in the 'down' conformation or those with the subunit-E IGF loop in a different ClpP cleft.

**Supplementary Movie 3. F<sup>seam</sup> subunit conformations.** A morph between the fully engaged (PDB code 8V9R) and *ssrA* tag recognition (PDB code 6WRF) conformations highlighting the motion in the F<sup>seam</sup> subunit as it transitions from the 'up' to 'down' conformations. According to the 'large-step' model, such a motion could be used to pull substrate down through the axial pore.
