# Supplementary material for: A proteolytic AAA+ machine poised to unfold protein substrates
Source: PubMed Central journal article supplement — Nat Commun. 2024 Nov 8;15:9681. doi: 10.1038/s41467-024-53681-9 (PMC11549327; doi:10.1038/s41467-024-53681-9), 2024-11-08
Supplement: 41467_2024_53681_MOESM6_ESM.pdf [file 41467_2024_53681_MOESM6_ESM.pdf]

**Supplementary Movie 1. Movements of the F<sup>seam</sup> subunit pore-1 loop.** A morph between atomic models of the recognition complex (PDB code 6WRF) and the fully engaged branched-degron DHFR•MTX complex (PDB code 8V9R). In the morph, the pore-1 loop of the F<sup>seam</sup> subunit in the substrate engaged structure has moved higher, positioning it closest to the pore-1 loop of subunit A<sup>1</sup> compared to its position in the recognition complex, where it is closest to the pore-1 loop of subunit E<sup>5</sup>.

**Supplementary Movie 2. Analysis of structural heterogeneity in the branched-degron DHFR•MTX complex.** A sampling of 100 volumes sampled from the *k*-means cluster centroid locations of latent embeddings displayed over a fixed atomic model (PDB code 8V9R). Note that we did not observe structures with the F<sup>seam</sup> subunit in the ‘down’ conformation or those with the subunit-E IGF loop in a different ClpP cleft.

**Supplementary Movie 3. Movements of the F<sup>seam</sup> subunit.** A morph between the fully engaged (PDB code 8V9R) and ssrA tag recognition (PDB code 6WRF) conformations highlighting the motion in the F<sup>seam</sup> subunit as it transitions from the ‘up’ to ‘down’ conformations. According to the ‘large-step’ model, such a motion could be used to pull substrate down through the axial pore.
